# Supplementary material for: Highly selective and sensitive phosphate anion sensors based on AlGaN/GaN high electron mobility transistors functionalized by ion imprinted polymer
Source: PubMed Central journal article supplement (PMC4899738; doi:10.1038/srep27728), 2016-06-09
Supplement: srep27728-s1.pdf [file srep27728-s1.pdf]

# Supplementary Information

## Highly selective and sensitive phosphate anion sensors based on AlGaN/GaN high electron mobility transistors functionalized by ion imprinted polymer

Xiuling Jia<sup>1,2</sup>, Dunjun Chen<sup>1,\*</sup>, Bin Liu<sup>1</sup>, Hai Lu<sup>1</sup>, Rong Zhang<sup>1\*</sup> & Youdou Zheng<sup>1</sup>

<sup>1</sup>Key Laboratory of Advanced Photonic and Electronic Materials, School of electronic Science and Engineering, Nanjing University, Nanjing, 210093, P. R. China.

<sup>2</sup>Chuzhou Vocational and Technical College, Chuzhou, 239000, P. R. China.

\* Correspondence to D.J.C. ([djchen@nju.edu.cn](mailto:djchen@nju.edu.cn)) or R. Z. ([rzhangsdu@nju.edu.cn](mailto:rzhangsdu@nju.edu.cn))

The chemical reaction processes of ion imprinting:

a.

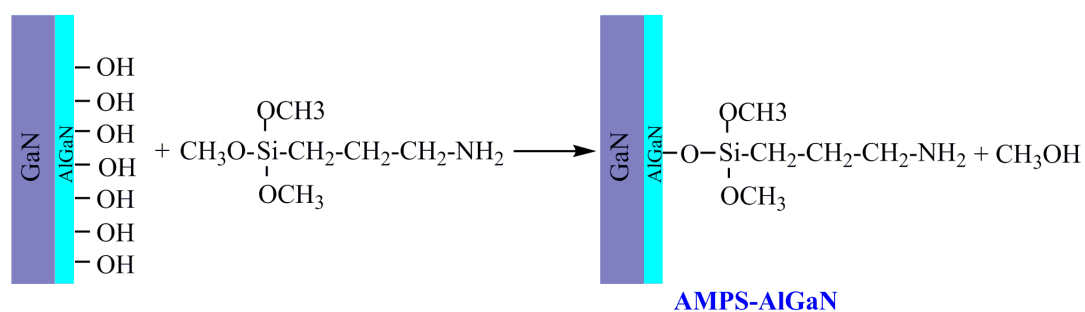

b.

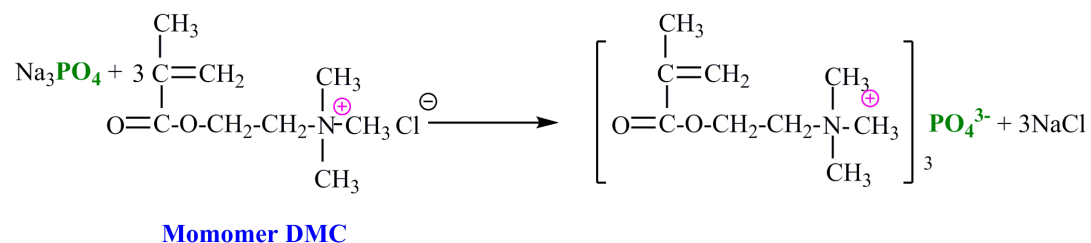

c.

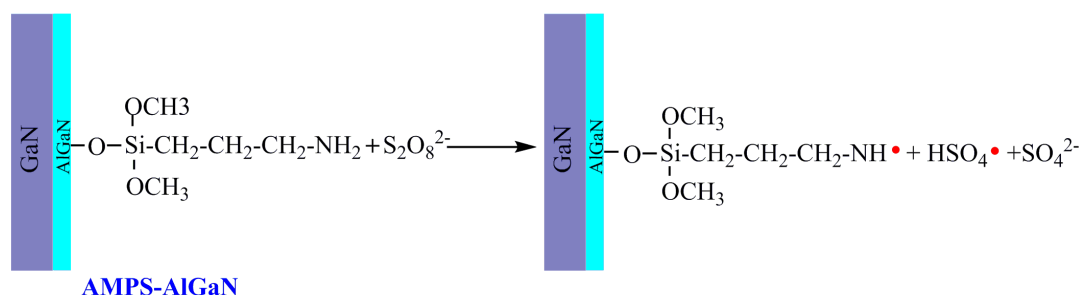

d.

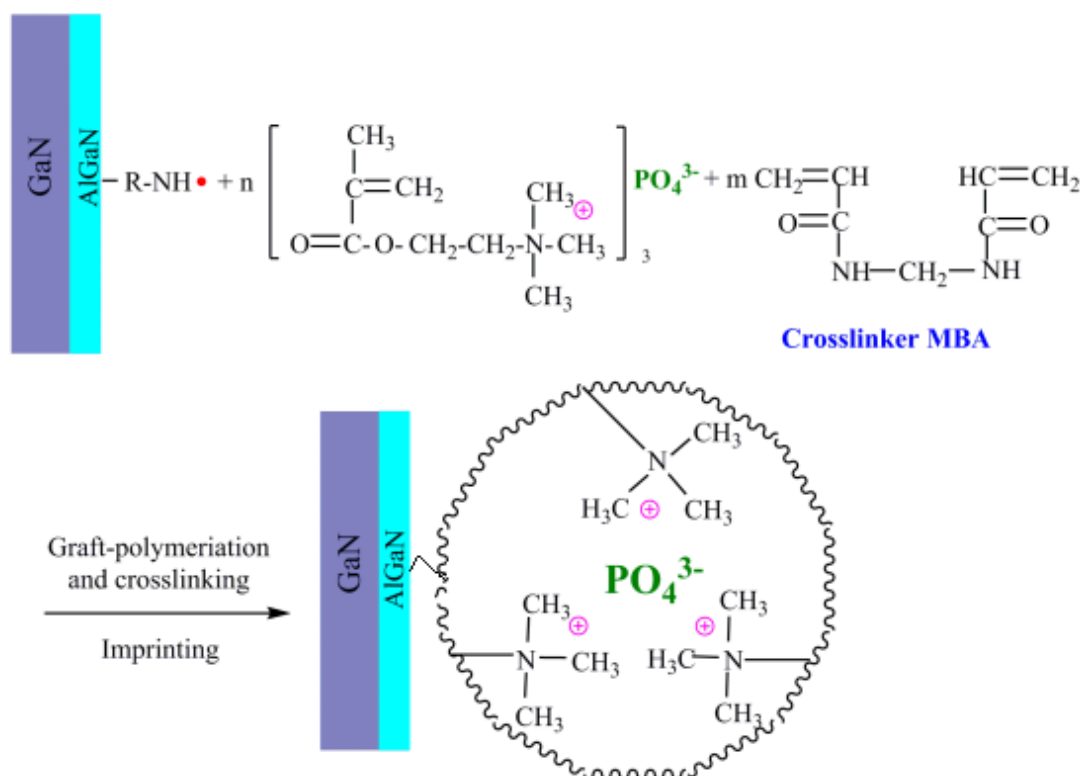

e.

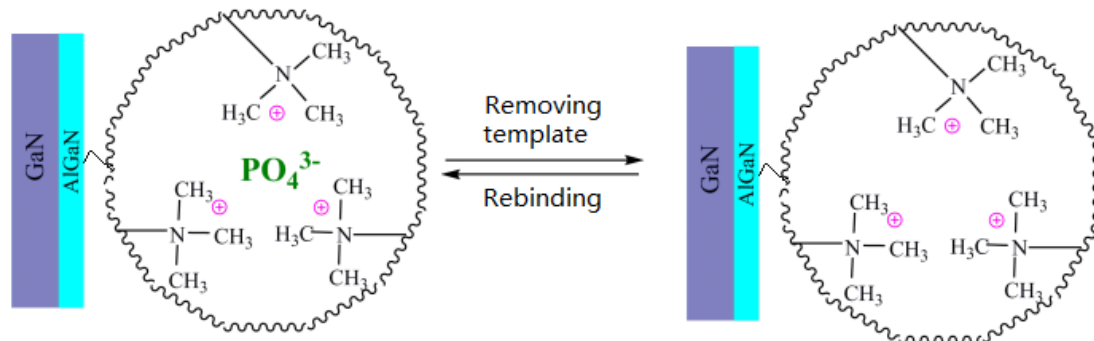

Figure 1. The chemical reaction processes of ion imprinting. (a). The sensor was first surface-modified with coupling agent AMPS. (b). Combination of monomer DMC with template  $\text{PO}_4^{3-}$  ion via ion exchange action. (c). Production of free radical on surfaces of modified silica gel particles. (d). Simultaneously surface-initiated graft-polymerizing and imprinting. (e). Removing template ion  $\text{PO}_4^{3-}$ .
